# Supplementary material for: Cheminformatics Study on Structural and Bactericidal Activity of Latest Generation β-Lactams on Widespread Pathogens
Source: MDPI journal article supplement (doi:10.3390/ijms232012685), 2022-10-21
Supplement: s1 [file s1]

# Supplementary Data

## Cheminformatic study on structure and bactericidal activity of latest generation $\beta$ -lactams on widespread pathogens

Ana Maria Raluca Gherman<sup>1,2</sup>, Vasile Chiş<sup>2\*</sup> and Nicoleta Elena Dina<sup>2</sup>

<sup>1</sup>Department of Molecular and Biomolecular Physics, National Institute for R&D of Isotopic and Molecular Technologies, Donat 67-103, 400293 Cluj-Napoca, Romania

<sup>2</sup>Faculty of Physics, Babeş-Bolyai University, Kogălniceanu 1, 400084 Cluj-Napoca, Romania

\*Corresponding author at Department of Molecular and Biomolecular Physics, National Institute for R&D of Isotopic and Molecular Technologies, Donat 67-103, 400293 Cluj-Napoca, Romania

E-mail address: nicoleta.dina@itim-cj.ro (Nicoleta Elena Dina)

**Table S1** – Assignment for the common FT-Raman bands (1064 nm excitation laser line) observed for BPN, OXN, APN, CBC, AZL as suggested by DFT calculations performed at B3LYP/6-311+G(2d,p) – harmonic ( $\omega_H$ ) and 6-31g(d) – anharmonic level ( $\omega_A$ ) of theory, in gas phase.

| BPN         | BPN<br>$\omega_H$ | BPN<br>$\omega_A$ | OXN         | OXN<br>$\omega_H$ | OXN<br>$\omega_A$ | APN      | APN<br>$\omega_H$ | APN<br>$\omega_A$ | CBN | CBC<br>$\omega_H$ | CBC<br>$\omega_A$ | AZL | AZL<br>$\omega_H$ | AZL<br>$\omega_A$ | Assignments                                                                                                                                            |
|-------------|-------------------|-------------------|-------------|-------------------|-------------------|----------|-------------------|-------------------|-----|-------------------|-------------------|-----|-------------------|-------------------|--------------------------------------------------------------------------------------------------------------------------------------------------------|
| 99sh (m)    | 77                | 91                |             | -                 | -                 |          | -                 | -                 |     | -                 | -                 |     | -                 | -                 | $\tau(\text{OCO}) + \tau(\text{benzene ring})$                                                                                                         |
| 130 (s)     | 112               | 125               | 107 (m)     | 105               | 113               | -        | -                 | -                 | 117 | -                 | -                 | 122 | -                 | -                 | $\tau(\text{benzene ring}) + \delta(\text{CO})$ (2-azetidinone ring) + $\delta(\text{NH}) + \tau(\text{CH}_3)$ (side chain)                            |
|             | -                 | -                 | -           | -                 | -                 | 118      | 116               | 112               |     | 82                | 66                |     | -                 | -                 | $\beta(\text{CCC})$ (benzene ring and side chain)                                                                                                      |
|             | -                 | -                 | -           | -                 | -                 | -        | -                 | -                 |     | -                 | -                 |     | 121               | 121               | $\delta_{\text{OUT}}(\text{ring}) + \delta_{\text{OUT}}(\text{C=O})$ (2-azetidinone ring)                                                              |
|             | -                 | -                 | 127 (w)     | 146               | 147               | -        | -                 | -                 |     | -                 | -                 |     | -                 | -                 | $\delta(\text{NH}) + \tau(\text{side chain ring}) + \rho(\text{benzene ring}) + \omega(\text{CH}_3)$ (side chain)                                      |
|             | -                 | -                 | -           | 147               | -                 | -        | -                 | -                 |     | -                 | -                 |     | -                 | -                 | $\tau(\text{isoxazole ring}) + \rho(\text{benzene ring}) + \delta(\text{NH}) + \delta(\text{CO})$ (side chain)                                         |
|             | -                 | -                 | 149 (m)     | -                 | 150               | 148      | -                 | -                 |     | -                 | -                 |     | -                 | -                 | $\rho(\text{CH}_3)$ (side chain) + $\rho(\text{benzene ring}) + \rho(\text{isoxazole ring})$                                                           |
|             | -                 | -                 | -           | -                 | -                 | 160      | 158               | 156               |     | -                 | -                 |     | -                 | -                 | $\rho(\text{NH}_2)$                                                                                                                                    |
|             | -                 | -                 | 171 (w)     | 164               | 166               | 174      | 172               | 175               |     | -                 | -                 |     | -                 | -                 | $\rho(\text{NH}_2) + \tau(\text{benzene ring}) + \omega(\text{CH}_3)$                                                                                  |
| 180 (m)     | 177               | 185               | 187 (vw)    | 202               | 199               | -        | -                 | -                 |     | -                 | -                 | 188 | 190               | 180               | $\rho(\text{CH}_2) + \delta_{\text{OUT}}(\text{NH}) + \delta_{\text{OUT}}(\text{C=O})$ (ring and 2-azetidinone ring) + $\delta_{\text{IN}}(\text{OH})$ |
| 208 (w)     | 188               | 196               | 211 (vw)    | 202               | 210               | 209      | 210               | 253               | 206 | -                 | -                 | -   | -                 | -                 | $\rho(\text{benzene ring}) + \tau(\text{NH}_2)$                                                                                                        |
| -           | -                 | -                 |             | 205               | -                 | -        | -                 | -                 | -   | -                 | -                 | -   | -                 | -                 | $\beta(\text{benzene ring; isoxazole ring})$                                                                                                           |
| -           | -                 | -                 | 233 (vw)    | 235               | 238               | 228      | 222               | 220               | -   | -                 | -                 | -   | -                 | -                 | $\beta(\text{CNC}) + \omega(\text{CH}_3)$                                                                                                              |
| 231 (w)     | 213               | 236               | -           | -                 | -                 | 240      | 236               | 237               | 246 | 246               | 240               | 241 | 241               | 221               | $\rho(\text{CH}_3)$                                                                                                                                    |
| -           | -                 | -                 | 250 (vw)    | 214               | 245               | 251 (vw) | 244               | 230               | -   | -                 | -                 | -   | -                 | -                 | $\tau(\text{CH}_3)$                                                                                                                                    |
| -           | -                 | -                 | -           | 264               | 265               | -        | -                 | -                 | -   | -                 | -                 | -   | -                 | -                 | $\tau(\text{CH}_3) + \tau(\text{ring 4}) + \beta(\text{benzene ring})$                                                                                 |
| 274 (m)     | 263               | 275               | 279 (vw)    | 283               | 286               | 271      | 273               | 270               | 280 | 287               | 283               | -   | -                 | -                 | $\rho(\text{CH}_3)$                                                                                                                                    |
| 292 sh (vw) | -                 | -                 | 296 sh (vw) | 285               | 289               | 291      | 301               | 303               |     | 290               | 291               | 294 | 298               | 291               | $\omega(\text{CH}_3) + \beta(\text{CCC})$                                                                                                              |
| 320 (w)     | 324               | 325               | -           | -                 | -                 | 317      | 318               | 314               | 317 | 305               | 300               | -   | -                 | -                 | $\rho(\text{CH}_3) + \rho(\text{OCO}) + \rho_{\text{out of plane}}(\text{thiazolidine ring})$                                                          |
| -           | -                 | -                 | 319 (w)     | 328               | 334               | -        | -                 | -                 | -   | -                 | -                 | -   | -                 | -                 | $\beta(\text{NCC}) + \tau(\text{CH}_3)$ (penam core)                                                                                                   |
| 333 (w)     | -                 | 331               | -           | -                 | -                 | -        | -                 | -                 | 335 | 341               | 332               | -   | -                 | -                 | $\rho(\text{OCO}) + \rho_{\text{in plane}}(\text{benzene ring}) + \rho(\text{CH}_3)$                                                                   |
| -           | -                 | -                 | -           | -                 | -                 | 340      | 334               | 333               | -   | -                 | -                 | -   | -                 | -                 | $\delta_{\text{OUT}}(\text{CH})$ - out of plane deformation of benzene ring + $\beta(\text{CCN}) + \beta(\text{CCC}) + \omega(\text{CH}_3)$            |
| -           | -                 | -                 | 336 (w)     | 352               | 353               | -        | -                 | -                 | -   | -                 | -                 | -   | -                 | -                 | $\nu(\text{CS}) + \beta(\text{benzene ring; isoxazole ring}) + \rho(\text{CH}_3)$ (penam core)                                                         |
| -           | -                 | -                 | -           | -                 | -                 | 351      | 353               | 352               | -   | -                 | -                 | -   | -                 | -                 | $\beta(\text{CCC}) + \omega(\text{CH}_3)$                                                                                                              |

# Supplementary Data

|             |     |     |            |         |     |     |     |     |     |     |     |     |     |     |                                                                                                                                                                                                                             |
|-------------|-----|-----|------------|---------|-----|-----|-----|-----|-----|-----|-----|-----|-----|-----|-----------------------------------------------------------------------------------------------------------------------------------------------------------------------------------------------------------------------------|
| 360 (w)     | 349 | 353 | -          | -       | -   | 360 | 364 | 365 | 361 | 363 | 359 | 360 | 366 | 362 | $\beta(\text{CCC})$ from $\text{CH}_3\text{-C-CH}_3$                                                                                                                                                                        |
| -           | 361 | 368 | 368 (vw)   | 379     | 386 | -   | -   | -   | -   | -   | -   | -   | -   | -   | $\beta(\text{CCC}) + \omega(\text{CH}_3) + \rho(\text{OCO}) + \omega(\text{benzene ring}) + \tau(\text{isoxazole ring})$                                                                                                    |
| -           | -   | -   | -          | -       | -   | 388 | 378 | 376 | 383 | 398 | 389 | 387 | 392 | 383 | $\beta(\text{CNC}) + \beta(\text{CCO})$ (penam core)                                                                                                                                                                        |
| -           | -   | -   | 388 (vw)   | 392     | 398 | -   | -   | -   | -   | -   | -   | -   | -   | -   | $\beta(\text{side chain; isoxazole ring}) + \rho(\text{benzene ring}) + \omega(\text{CH}_3)$                                                                                                                                |
| 392 (vw)    | 382 | 390 | -          | -       | -   | -   | -   | -   | -   | -   | -   | -   | -   | -   | $\beta(\text{CCN}) + \beta(\text{CCO}) + \delta(\text{OH}) + \delta(\text{NH})$                                                                                                                                             |
| 402 (vw)    | -   | -   | 406 (vw)   | 405     | 415 | 409 | -   | -   | 405 | 414 | 407 | 409 | 410 | 407 | $\delta_{\text{IN}}(\text{C=O})$ (benzene ringring and chain)                                                                                                                                                               |
| 412         | 398 | 415 | -          | -       | -   | -   | -   | -   | -   | -   | -   | -   | -   | -   | $\delta(\text{CH})$ out of plane – out of plane deformation of benzene ring                                                                                                                                                 |
| -           | -   | -   | -          | -       | -   | 423 | 426 | 421 | -   | -   | -   | 425 | -   | -   | $\beta(\text{NCC}) + \delta_{\text{OUT}}(\text{CH})$ (benzene ring)                                                                                                                                                         |
| 448 (vw)    | 448 | 455 | 443 (vw)   | 422     | 424 | -   | -   | -   | -   | -   | -   | -   | -   | -   | $\beta(\text{CCC}) + \omega(\text{CH}_3)$ (side chain)                                                                                                                                                                      |
| 468 (m)     | 477 | 476 | -          | -       | -   | 465 | 462 | 460 | -   | -   | -   | 465 | 491 | 463 | $\delta_{\text{OUT}}(\text{NH})$ (imidazolidine ring)                                                                                                                                                                       |
| 478sh (w)   | 492 | 487 | 477 (vw)   | 461     | 463 | -   | -   | -   | -   | -   | -   | 479 | 491 | 478 | $\delta_{\text{OUT}}(\text{NH})$ (imidazolidine ring)                                                                                                                                                                       |
| -           | -   | -   | -          | -       | -   | 483 | 484 | 479 | 480 | 494 | 484 | -   | -   | -   | $\beta(\text{NCS}) + \delta_{\text{OUT}}(\text{CH}) + \delta_{\text{OUT}}(\text{NH}) + \delta_{\text{OUT}}(\text{OH})$                                                                                                      |
| -           | -   | -   | 492 (vw)   | 492(vw) | 481 | -   | -   | -   | -   | -   | -   | -   | -   | -   | $\delta(\text{NH})$                                                                                                                                                                                                         |
| -           | -   | -   | -          | -       | -   | 498 | 493 | 491 | -   | -   | -   | -   | -   | -   | $\beta(\text{CNS}) + \beta(\text{OCN}) + \delta(\text{CH}) + \delta(\text{NH})$                                                                                                                                             |
| 514 (vw)    | 522 | 529 | -          | -       | -   | -   | -   | -   | -   | -   | -   | 510 | -   | -   | $\beta(\text{CCC}) + \omega(\text{CH}_3) + \beta(\text{CCN}) + \delta(\text{NH}) + \delta(\text{CH})$ (2-azetidinone ring)                                                                                                  |
| -           | -   | -   | 522 (w)    | 501     | 505 | 522 | 531 | 526 | 525 | 522 | 521 | -   | -   | -   | $\delta_{\text{OUT}}(\text{OH}) + \beta(\text{CCC}) + \delta_{\text{OUT}}(\text{CH}) + \delta_{\text{OUT}}(\text{NH}) + \omega(\text{CH}_3)$                                                                                |
| 534 (vw)    | -   | -   | -          | -       | -   | -   | -   | -   | -   | -   | -   | 532 | 537 | 529 | $\delta_{\text{OUT}}(\text{benzene ring})$                                                                                                                                                                                  |
| -           | -   | -   | 541 (vw)   | 523     | -   | --  | -   | -   | -   | -   | -   | -   | -   | -   | $\beta(\text{CCN})$ – in plane deformation of thiazolidine ring + $\delta(\text{CH})$ (2-azetidinone ring) + $\delta(\text{NH}) + \beta(\text{CCC}) + \omega(\text{CH}_3)$                                                  |
| -           | -   | -   |            | 558     | -   | -   | -   | -   | -   | -   | -   | -   | -   | -   | $\delta(\text{CH})$ out of plane (benzene ring) + $\nu(\text{CS})$ – in plane deformation of thiazolidine ring + $\beta(\text{CCC})$ (penam core)                                                                           |
| 571sh (m)   | 556 | 569 | 579 (w)    | 561     | 575 | -   | -   | -   | 575 | 571 | 559 | 575 | 571 | 558 | $\beta(\text{CCC})$ (thiazolidine ring)                                                                                                                                                                                     |
| 582 (m)     | 574 | 586 |            | -       | -   | -   | -   | -   | -   | -   | -   | -   | -   | -   | $\beta(\text{CCN}) + \nu(\text{CS})$ – in plane deformation of thiazolidine ring + $\delta(\text{CH})$ (2-azetidinone and benzene ring) + $\delta(\text{NH})$                                                               |
| -           | -   | -   | -          | -       | -   | 588 | 570 | 558 | 589 | 598 | 586 | -   | -   | -   | $\beta(\text{OCC}) + \delta_{\text{OUT}}(\text{CH}) + \delta_{\text{OUT}}(\text{OH}) + \delta_{\text{OUT}}(\text{NH})$                                                                                                      |
| -           | -   | -   | -          | -       | -   | -   | -   | -   | -   | -   | -   | 594 | 592 | 580 | $\delta_{\text{OUT}}(\text{CH})$ out of phase (2-azetidinone ring) + $\rho(\text{CCC})$ (penam core) + $\delta_{\text{IN}}(\text{NH})$ (side chain)                                                                         |
| 602 sh (vw) | 606 | 617 | 616 (w)    | 592     | 603 | 601 | 602 | 594 | 607 | -   | -   | -   | -   | -   | $\beta(\text{NCS})$ – in plane deformation of thiazolidine ring + $\delta(\text{CH}) + \delta(\text{NH})$                                                                                                                   |
| -           | -   | -   | 629 (vw)   | 626     | 633 | 615 | -   | -   | 617 | 631 | 623 | 617 | 634 | 625 | $\delta_{\text{OUT}}(\text{NH})$ + in plane deformation of benzene ring + $\delta_{\text{IN}}(\text{imidazolidine ring})$                                                                                                   |
| 621 (w)     | 628 | 630 | -          | -       | -   | -   | -   | -   | -   | -   | -   | -   | -   | -   | $\omega(\text{CCC})$ – out of plane deformation of benzene ring + $\delta(\text{CH})$ out of plane (benzene ring) + $\nu(\text{CS})$ – in plane deformation of thiazolidine ring + $\delta(\text{CH})$ (2-azetidinone ring) |
| -           | -   | 638 | -          | -       | -   | 635 | 650 | 641 | -   | -   | -   | -   | -   | -   | $\beta(\text{NCC}) + \delta(\text{CH})$ (penam core)                                                                                                                                                                        |
| -           | -   | -   | -          | -       | -   | -   | -   | -   | -   | -   | -   | 641 | 641 | 626 | $\delta_{\text{OUT}}(\text{NH})$ (benzene ring)                                                                                                                                                                             |
| -           | -   | -   | 648 (w)    | 642     | 648 | -   | -   | -   | -   | -   | -   | -   | -   | -   | out of plane deformation of isoxazole ring + $\rho(\text{CH}_3)$ (side chain)                                                                                                                                               |
| 647 (vw)    | 647 | 661 |            | 643     | 654 | -   | -   | -   | -   | -   | -   | -   | -   | -   | $\beta(\text{CNC})$ – in plane deformation of thiazolidine ring + $\delta(\text{CH})$ (penam core) + $\beta(\text{NOC})$ – out of plane deformation of isoxazole ring + $\omega(\text{CH}_3)$ (side chain)                  |
| 661 (w)     | 656 | 668 | -          | -       | -   | -   | -   | -   | 666 | 663 | 643 | 661 | 664 | 654 | $\delta_{\text{OUT}}(\text{NH}) + \delta_{\text{OUT}}(\text{CH}) + \delta_{\text{OUT}}(\text{OH})$                                                                                                                          |
| -           | -   | -   | 656 sh     | 653     | 665 | 670 | 666 | 656 | -   | -   | -   | -   | -   | -   | $\nu(\text{CS})$ (in plane deformation of thiazolidine ring) + $\beta(\text{OCO}) + \delta(\text{OH}) + \delta(\text{CH}) + \delta(\text{NH})$                                                                              |
| -           | -   | -   |            | 661     | 670 | -   | -   | -   | -   | -   | -   | -   | -   | -   | $\beta(\text{CCC})$ – in plane deformation of benzene ring + $\delta(\text{CH})$ in plane (benzene ring) + in plane deformation of isoxazole ring + $\nu(\text{CC})$                                                        |
| -           | -   | -   | 688sh (vw) | 703     | -   | -   | -   | -   | -   | -   | -   | -   | -   | -   | $\tau(\text{CCC})$ – out of plane deformation of benzene ring and isoxazole ring)                                                                                                                                           |

# Supplementary Data

|            |      |      |              |      |      |         |           |            |        |      |            |        |         |         |                                                                                                                                                                                                                                      |
|------------|------|------|--------------|------|------|---------|-----------|------------|--------|------|------------|--------|---------|---------|--------------------------------------------------------------------------------------------------------------------------------------------------------------------------------------------------------------------------------------|
| -          | -    | -    | -            | -    | -    | 695     | 715       | 700        | -      | -    | -          | -      | -       | -       | $\delta_{\text{OUT}}(\text{CH})$ - of benzene ring                                                                                                                                                                                   |
| 703 (vw)   | -    | -    | 702 (vw)     | 700  | -    | -       | -         | -          | -      | -    | -          | -      | -       | -       | $\delta(\text{CH})$ (benzene ring)                                                                                                                                                                                                   |
| 721 (w)    | 727  | 743  | -            | -    | -    | 723     | -         | -          | 719    | 741  | 726        | 714    | 719     | 704     | $\delta_{\text{OUT}}(\text{CH})$ (benzene ring) + $\delta_{\text{OUT}}(\text{NH}) + \rho(\text{CH}_2)$ (imidazolidine ring)                                                                                                          |
| -          | -    | -    | -            | -    | -    | 730     | 742       | 726        | -      | -    | -          | 734    | 743     | 728     | $\beta(\text{CCC}) + \tau(\text{CH}_3) + \delta_{\text{OUT}}(\text{NH})$ (side chain)                                                                                                                                                |
| -          | -    | -    | 734 (vw)     | 726  | 736  | -       | -         | -          | -      | -    | -          | -      | -       | -       | $\beta(\text{CCN})$ – in plane deformation of 2-azetidinone ring + $\delta(\text{CH})$ (2-azetidinone ring) + $\nu(\text{CC})$ – in plane deformation of isoxazole ring + $\beta(\text{CCC})$ – in plane deformation of benzene ring |
| 748 (w)    | 742  | 756  | 747 (vw)     | 727  | 745  | -       | -         | -          | 746    | 767  | 751        | -      | -       | -       | $\delta_{\text{OUT}}(\text{CH})$ (benzene ring) + $\beta(\text{OCO}) + \delta(\text{CH})$                                                                                                                                            |
| -          | -    | -    | -            | -    | -    | 752     | 754       | 744        | -      | -    | -          | -      | -       | -       | $\beta(\text{CCN}) + \delta(\text{CH}) + \delta(\text{OH})$ (penam core)                                                                                                                                                             |
| 762 (vw)   | 765  | 777  | 766 (vw)     | 754  | 763  | -       | 769       | 760        | 767    | 800  | 766        | -      | -       | -       | $\delta_{\text{OUT}}(\text{CH})$ (benzene ring) + $\beta(\text{OCN})$                                                                                                                                                                |
| 776 (vw)   | 779  | -    | 777 (vw)     | 766  | 784  | -       | -         | -          | -      | -    | -          | -      | -       | -       | $\delta(\text{CH})$ (benzene ring) + $\omega(\text{CCN})$ (side chain)                                                                                                                                                               |
| -          | -    | -    | -            | -    | -    | 780     | -         | 779        | -      | -    | -          | 786    | 803     | 789     | $\beta(\text{CCN}) + \beta(\text{CNC})$ (side chain)                                                                                                                                                                                 |
| -          | -    | -    | 793sh (vw)   | 787  | 803  | -       | -         | -          | -      | -    | -          | -      | -       | -       | $\delta(\text{CH})$ (benzene ring) + $\omega(\text{CCC})$ – out of plane deformation of isoxazole ring + $\omega(\text{CH}_3)$ (side chain)                                                                                          |
| 807 (vw)   | 800  | 806  | -            | 776  | 807  | 802     | 806       | 803        | 803    | 808  | 786        | -      | -       | -       | $\delta(\text{OH}) + \delta(\text{CH}) + \delta(\text{NH}) + \beta(\text{CNC}) + \beta(\text{OCO})$                                                                                                                                  |
| -          | -    | -    | -            | -    | -    | -       | -         | -          | -      | -    | -          | 813    | 807     | 792     | in plane deformation of 2-azetidinone ring + $\delta_{\text{OUT}}(\text{OH}) + \delta_{\text{OUT}}(\text{CH})$ (thiazolidine ring)                                                                                                   |
| -          | -    | -    | 813 (vw)     | 805  | 815  | -       | -         | -          | -      | -    | -          | -      | -       | -       |                                                                                                                                                                                                                                      |
| -          | -    | -    |              | 808  | 825  | 830     | 838       | 831        | 834    | 852  | 813        | -      | -       | -       | $\delta_{\text{OUT}}(\text{CH})$ (benzene ring) (+ $\delta_{\text{OUT}}(\text{OH})$ )                                                                                                                                                |
| 839 (w)    | -    | 849  | 845(vw)      | 846  | 862  | -       | -         | -          | -      | -    | -          | -      | -       | -       | $\delta(\text{CH})$ (benzene ring)                                                                                                                                                                                                   |
| -          | -    | -    | -            | -    | -    | 847     | 858       | 856        | 847    | 877  | 856        | 850    | 888     | 866     | $\delta_{\text{OUT}}(\text{OH})$                                                                                                                                                                                                     |
| 873 (w)    | -    | 862  | -            | -    | -    | 873     | 873       | 858        | 876    | 887  | 869        | 870    | -       | -       | $\delta(\text{OH}) + \beta(\text{CNC})$ + in plane deformation of benzene ring                                                                                                                                                       |
| 895 (w)    | -    | 879  | -            | -    | -    | -       | -         | -          | -      | -    | -          | -      | -       | -       | $\delta(\text{OH})$                                                                                                                                                                                                                  |
| -          | -    | -    | -            | -    | -    | -       | -         | -          | -      | -    | -          | 899    | 914     | 902     | $\beta(\text{CNC})$                                                                                                                                                                                                                  |
| -          | -    | -    | 894 (w)      | 887  | 900  | 910     | 903       | 903        | 891 sh | 887  | 910        | -      | -       | -       | $\delta_{\text{OUT}}(\text{CH})$ (benzene ring) + $\delta(\text{OH})$                                                                                                                                                                |
| -          | -    | -    | 908 (vw)     | 921  | 917  | -       | -         | -          | -      | -    | -          | -      | -       | -       | $\nu(\text{ON})$ – in plane deformation of isoxazole ring + $\omega(\text{CH}_3)$ (side chain) + $\delta(\text{CH})$ (benzene ring)                                                                                                  |
| 910 (vw)   | 910  | -    | -            | -    | -    | 926(vw) | 925       | 923        | -      | -    | -          | 913    | 930;933 | 913;921 | $\delta_{\text{OUT}}(\text{CH})$ (benzene ring); $\beta(\text{CNC})$ (thiazolidine ring)                                                                                                                                             |
| 919 (vw)   | 919  | 925  | 920 (vw)     | 920  | 933  | -       | -         | -          | 920    | 933  | 922        | -      | -       | -       | $\beta(\text{CNC}) + \nu_{\text{as}}(\text{OCO}) + \omega(\text{CH}_3)$                                                                                                                                                              |
| 933 (vw)   | 937  | 934  | -            | -    | -    | -       | -         | -          | -      | -    | -          | -      | -       | -       | $\beta(\text{CNC}) + \nu(\text{CC})$ (2-azetidinone ring) + $\nu_{\text{sym}}(\text{OCO}) + \delta(\text{CH})$                                                                                                                       |
| 945 (vw)   | 948  | 950  | 944 (vw)     | 950  | 958  | -       | -         | -          | -      | -    | -          | -      | -       | -       | $(\text{CC}) + \delta(\text{CH})$ (2-azetidinone ring) + $\omega(\text{CH}_3)$ (penam core)                                                                                                                                          |
| -          | -    | -    | -            | -    | -    | 951     | 952       | 950        | 948    | 959  | 945        | 948    | 951     | 933     | $\omega(\text{CH}_3)$                                                                                                                                                                                                                |
| 960 (vw)   | 982  | 964  | -            | -    | -    | 961     | 964       | 975        | -      | -    | -          | 958    | 962     | 947     | $\omega(\text{CH}_3) + \nu(\text{CC}) + \delta(\text{NH})$ (imidazolidine ring)                                                                                                                                                      |
| -          | -    | -    | -            | -    | -    | -       | -         | -          | 957    | 982  | 953        | -      | -       | -       | $\delta_{\text{OUT}}(\text{CH})$ (benzene ring)                                                                                                                                                                                      |
| 983sh (vw) | 1016 | 1016 | 982sh (w)    | 993  | 968  | 982     | -         | -          | -      | -    | -          | 988 sh | -       | -       | $\delta(\text{CH})$ (benzene ring)                                                                                                                                                                                                   |
| -          | -    | -    | -            | 997  | 976  | 993     | 971       | 990        | -      | -    | -          | -      | -       | -       | $\beta(\text{CCC})$ – in plane deformation of benzene ring                                                                                                                                                                           |
| 1002 (vs)  | 1005 | 989  | 1002 (vs)    | 1006 | 987  | 1004    | 988       | 1009       | 1004   | 989  | 1000       | 1003   | 989     | 1008    | in plane deformation of benzene ring                                                                                                                                                                                                 |
| -          | -    | -    | -            | -    | -    | -       | 993       | 980        | -      | 982  | 1008       | -      | 994     | 984     | $\delta_{\text{IN}}(\text{CH})$ out of phase (2-azetidinone ring)                                                                                                                                                                    |
| 1029 (m)   | -    | -    | 1026 (vw)    | 1039 | 1013 | 1027    | 997; 1014 | 1032; 1032 | 1032   | 1017 | 1039; 1045 | 1030   | 1017    | 1042    | $\delta_{\text{IN}}(\text{CH})$ out of phase (benzene ring)                                                                                                                                                                          |
| -          | -    | -    | 1035 sh (vw) | 1045 | 1018 | 1037    | 1015      | 1044       | -      | -    | -          | -      | -       | -       | $\beta(\text{CCC}) + \delta(\text{CH})$ (benzene ring) + $\omega(\text{CH}_3)$                                                                                                                                                       |
| -          | 1042 | 1059 | -            | -    | -    | 1071    | 1073      | 1095       | 1076   | 1058 | 1078       | 1070   | 1073    | 1071    | $\nu(\text{CN})$ ( $\beta$ -lactam ring)                                                                                                                                                                                             |
| 1090 (vw)  | 1150 | 1109 | -            | -    | -    | -       | -         | -          | 1089   | -    | -          | 1090   | 1093    | 1094    | $\delta_{\text{IN}}(\text{CH})$ out of phase (benzene ring)                                                                                                                                                                          |
| -          | -    | -    | -            | -    | -    | -       | -         | -          | 1098   | 1070 | 1114       | -      | -       | -       | in plane def of benzene ring + $\delta_{\text{IN}}(\text{CH})$                                                                                                                                                                       |
| 1122 (w)   | 1168 | 1129 | 1113sh(vw)   | 1157 | 1130 | -       | -         | -          | -      | -    | -          | -      | -       | -       | $\nu(\text{CC}) + \delta(\text{CH})$                                                                                                                                                                                                 |
| -          | -    | -    | -            | -    | -    | 1119    | 1124      | 1149       | -      | -    | -          | -      | -       | -       | $\nu(\text{CN}) + \delta(\text{NH}) + \delta(\text{CH}) + \tau(\text{NH}_2)/\omega(\text{CH}_3) + \nu(\text{CC}) + \delta(\text{CH})$                                                                                                |

# Supplementary Data

|            |      |      |             |      |      |      |      |      |      |      |      |      |      |      |                                                                                                                                                                                                                                  |
|------------|------|------|-------------|------|------|------|------|------|------|------|------|------|------|------|----------------------------------------------------------------------------------------------------------------------------------------------------------------------------------------------------------------------------------|
| -          | -    | -    | -           | -    | -    | -    | -    | -    | -    | -    | -    | 1125 | 1109 | 1128 | $\nu(\text{NCN}) + \tau(\text{CH}_2)$ – in plane deformation of imidazolidine ring                                                                                                                                               |
| -          | -    | -    | 1126 (vw)   | 1197 | 1147 | -    | -    | -    | 1126 | 1109 | 1128 | -    | -    | -    | $\omega(\text{CCC}) + \tau(\text{CH}_3) + \delta_{\text{OUT}}(\text{CH})$                                                                                                                                                        |
| -          | -    | -    |             | 1183 | 1148 | -    | -    | -    | -    | -    | -    | -    | -    | -    | $\delta(\text{CH})$ (2-azetidinone ring)                                                                                                                                                                                         |
| 1156 (w)   | 1183 | 1145 | 1148sh (w)  | 1209 | 1167 | -    | -    | -    | -    | -    | -    | -    | -    | -    | $\delta(\text{CH})$ in plane (benzene ring)                                                                                                                                                                                      |
| -          | 1189 | 1147 | -           | -    | -    | 1156 | 1151 | 1156 | 1156 | 1144 | 1174 | 1158 | 1110 | 1132 | $\delta_{\text{OUT}}(\text{CH})$ out of phase (2-azetidinone ring)                                                                                                                                                               |
| -          | -    | 1155 | -           | -    | -    | -    | -    | -    | -    | 1146 | 1177 |      | 1129 | 1151 | $\delta_{\text{OUT}}(\text{CH})$ out of phase (2-azetidinone ring)                                                                                                                                                               |
| -          | -    | -    | -           | -    | -    | -    | -    | -    | -    | -    | -    |      | 1135 | 1151 | $\beta(\text{CNC})$ (side chain)                                                                                                                                                                                                 |
| -          | -    | -    | 1163 (w)    | 1201 | 1171 | -    | -    | -    | -    | -    | -    | -    | -    | -    | $\nu(\text{CN}) + \delta(\text{CH})$ (2-azetidinone ring)                                                                                                                                                                        |
| 1176 (w)   | 1205 | 1183 | -           | -    | -    | 1178 | 1176 | 1160 | -    | -    | -    | 1175 | -    | -    | $\nu(\text{CC}) + \delta(\text{CH}) + \delta(\text{NH}) + \omega(\text{CH}_3)$                                                                                                                                                   |
| -          | -    | -    | 1181 (vw)   | 1183 | 1199 | -    | -    | -    | 1180 | 1159 | 1180 | -    | -    | -    | $\nu(\text{CN}) + \delta(\text{CH})$ (2-azetidinone)                                                                                                                                                                             |
| -          | -    | -    | -           | -    | -    | 1186 | 1178 | 1175 | -    | -    | -    | 1186 | 1170 | 1190 | $\delta_{\text{IN}}(\text{CH})$ out of phase (benzene ring)                                                                                                                                                                      |
| 1201 (w)   | 1220 | 1201 | -           | -    | -    | 1197 | 1192 | 1192 | -    | -    | -    | -    | -    | -    | $\delta_{\text{IN}}(\text{CH})$ in plane (2-azetidinone ring) + $\nu(\text{CN}) + \delta(\text{NH})$                                                                                                                             |
| -          | -    | -    | -           | -    | -    | -    | -    | -    | -    | -    | -    | 1211 | 1193 | 1216 | $\delta_{\text{OUT}}(\text{CH})$ out phase (2-azetidinone ring) + $\delta(\text{NH}) + \delta(\text{CH})$ (side chain)                                                                                                           |
| -          | -    | -    | -           | -    | -    | 1217 | 1200 | 1209 | -    | -    | -    | -    | -    | -    | $\delta_{\text{OUT}}(\text{CH})$ in plane (2-azetidinone ring) + $\nu(\text{CN}) + \delta(\text{NH})$                                                                                                                            |
| -          | -    | -    | 1220 (vw)   | 1222 | 1242 | -    | -    | -    | -    | -    | -    | 1223 | 1204 | 1227 | $\delta(\text{CH})$ in phase (2-azetidinone ring) + $\delta_{\text{IN}}(\text{NH}) + \delta_{\text{IN}}(\text{CH})$ (side chain)                                                                                                 |
| 1232sh (w) | -    | 1229 | -           | -    | -    | 1233 | 1228 | 1230 | -    | -    | -    | -    | -    | -    | $\delta_{\text{IN}}(\text{CH})$ out of plane (2-azetidinone ring)                                                                                                                                                                |
| 1245 (w)   | 1257 | 1241 | -           | -    | -    | 1249 | 1241 | 1277 | -    | -    | -    | -    | -    | -    | $\nu(\text{OH}) + \nu(\text{CC}) + \delta(\text{OH})$                                                                                                                                                                            |
| -          | -    | -    | 1251sh (vw) | 1260 | 1262 | 1255 | 1266 | 1265 | 1252 | 1229 | 1250 | -    | -    | -    | $\delta(\text{CH}) + \delta(\text{NH}) + \delta(\text{OH})$                                                                                                                                                                      |
| -          | -    | -    | 1264 (w)    | 1267 | 1272 | -    | -    | -    | -    | -    | -    | 1261 | 1229 | 1261 | $\delta_{\text{OUT}}(\text{CH})$ (penam core)                                                                                                                                                                                    |
| -          | -    | -    |             | 1273 | 1274 | -    | -    | -    | -    | -    | -    | -    | -    | -    | $\nu(\text{CC}) + \nu(\text{CN}) + \delta(\text{CH}) + \delta(\text{NH}) + \delta(\text{OH})$ (penam core)                                                                                                                       |
| -          | -    | -    | -           | -    | -    | -    | -    | -    | -    | -    | -    | -    | 1239 | 1266 | $\omega(\text{CH}_2)$ (imidazolidine ring)                                                                                                                                                                                       |
| 1292(m)    | 1307 | 1283 | -           | -    | -    | -    | -    | -    | 1297 | 1271 | 1289 | -    | -    | -    | $\delta_{\text{OUT}}(\text{CH})$ (thiazolidine ring + beta-lactam ring)                                                                                                                                                          |
| -          | -    | -    | -           | -    | -    | -    | -    | -    | -    | 1273 | 1290 | -    | -    | -    | $\delta_{\text{OUT}}(\text{CH})$ (thiazolidine ring)                                                                                                                                                                             |
| 1304sh(vw) | 1295 | 1270 | 1308 (vw)   | 1300 | 1312 | -    | -    | -    | -    | -    | -    | -    | -    | -    | $\nu(\text{CN}) + \nu(\text{CO})$ – in plane deformation of isoxazole ring + $\nu(\text{CC})$ – in plane deformation of benzene ring + $\delta(\text{CH})$ (benzene ring) + $\delta(\text{NH}) + \delta(\text{CH})$ (penam core) |
| -          | -    | -    | 1317 (vw)   | 1303 | 1317 | 1315 | 1318 | 1308 | 1319 | 1293 | 1329 | 1317 | 1278 | 1311 | $\delta_{\text{IN}}(\text{CH}) + \delta_{\text{IN}}(\text{NH})$ (side chain) + $\delta(\text{CH})$ (benzene ring)                                                                                                                |
| 1328(w)    | 1327 | 1306 | -           | -    | -    | -    | -    | -    | -    | -    | -    | -    | -    | -    | $\delta(\text{CH}) + \delta(\text{NH}) + \beta(\text{CNC}) + \omega(\text{CH}_2)$                                                                                                                                                |
| -          | -    | -    | 1353 (w)    | 1343 | 1355 | 1349 | 1350 | 1339 | -    | -    | -    | -    | -    | -    | $\nu(\text{CC}) + \delta(\text{CH})$ in plane (benzene ring) + $\tau(\text{NH}_2)$                                                                                                                                               |
| -          | -    | -    | -           | -    | -    | -    | 1354 | 1343 | -    | -    | -    | -    | -    | -    | $\nu(\text{CN}) + \delta(\text{CH})$ (2-azetidinone)                                                                                                                                                                             |
| -          | -    | -    | -           | -    | -    | 1363 | 1367 | 1361 | -    | -    | -    | -    | -    | -    | $\beta(\text{CH}_3)$ out of phase                                                                                                                                                                                                |
| 1370(vw)   | 1377 | 1355 | 1371 (vw)   | 1356 | 1364 | -    | -    | -    | 1372 | 1355 | 1373 | 1369 | 1342 | 1365 | $\delta(\text{CH})$ (benzene ring) + $\delta(\text{CH})$ (side chain)                                                                                                                                                            |
| -          | -    | -    | -           | -    | -    | 1382 | 1385 | 1380 | 1386 | 1355 | 1389 | -    | -    | -    | $\delta_{\text{OUT}}(\text{CH}) + \delta_{\text{IN}}(\text{OH})$ (penam core)                                                                                                                                                    |
| -          | -    | -    | 1384 (vw)   | 1388 | 1382 | -    | -    | -    | -    | -    | -    | -    | -    | -    | $(\text{CH}_3) + \nu(\text{CC})$ (isoxazole ring) + $\delta(\text{CH})$ in plane (benzene ring)                                                                                                                                  |
| -          | -    | -    | -           | -    | 1385 | -    | -    | -    | -    | -    | -    | -    | -    | -    | $\delta(\text{OH})$ (penam core) + $\beta(\text{CH}_3)$                                                                                                                                                                          |
| -          | -    | -    | 1390 (vw)   | 1397 | 1390 | 1392 | 1389 | 1398 | -    | -    | -    | 1397 | 1374 | 1399 | $\omega(\text{CH}_2) + \delta_{\text{IN}}(\text{NH})$ (imidazolidine ring)                                                                                                                                                       |
| 1419 (w)   | 1403 | 1412 | 1418sh (vw) | -    | -    | -    | -    | -    | -    | -    | -    | -    | -    | -    | $\beta(\text{CH}_2)$                                                                                                                                                                                                             |
| 1436 (w)   | 1424 | 1435 | 1433 sh     | -    | -    | 1435 | 1435 | 1410 | 1436 | 1435 | 1460 | 1437 | 1434 | 1454 | $\beta_{\text{as}}(\text{CH}_3)$ out of phase                                                                                                                                                                                    |
| -          | -    | -    | 1444 (m)    | 1443 | 1415 | -    | -    | -    | -    | -    | -    | -    | -    | -    | $\beta(\text{CH}_3)$ (side chain)                                                                                                                                                                                                |
| -          | -    | -    | -           | 1458 | 1425 | -    | -    | -    | -    | -    | -    | -    | -    | -    | $\nu(\text{CC}) + \delta(\text{CH})$ in plane (benzene ring) + $\nu(\text{C=N}) + \beta(\text{CH}_3)$ (isoxazole ring)                                                                                                           |
| 1452 (vw)  | 1449 | 1457 | 1459        | -    | -    | 1456 | 1457 | 1446 | 1457 | 1456 | 1488 | 1458 | 1442 | 1476 | $\delta(\text{CH})$ (benzene ring + side chain)                                                                                                                                                                                  |
| 1468 (vw)  | 1475 | 1481 | -           | -    | -    | -    | 1457 | -    | -    | 1457 | 1489 | -    | 1456 | 1477 | $\beta_{\text{sym}}(\text{CH}_3)$ in phase                                                                                                                                                                                       |
| 1499 (vw)  | 1499 | 1483 | 1471 (m)    | 1483 | 1450 | -    | -    | -    | -    | -    | -    | -    | -    | -    | $\nu(\text{C=N}) + \nu(\text{CC})$ (ring 4) + $\nu(\text{CCC}) + \delta(\text{CH})$ (benzene ring) + $\beta(\text{CH}_3)$ (side chain)                                                                                           |
| -          | -    | -    | -           | -    | -    | -    | -    | -    | -    | -    | -    | 1491 | 1457 | 1482 | $\beta_{\text{as}}(\text{CH}_3)$ in phase                                                                                                                                                                                        |
| -          | -    | -    | -           | -    | -    | -    | -    | -    | -    | -    | -    | -    | 1476 | 1508 | $\beta(\text{CH}_2)$ in phase                                                                                                                                                                                                    |
| -          | -    | -    | 1516 (w)    | 1540 | 1490 | 1512 | 1477 | 1530 | -    | -    | -    | -    | -    | -    | $\nu(\text{CN}) + \delta(\text{NH})$                                                                                                                                                                                             |
| -          | -    | -    |             | 1526 | 1490 | -    | -    | -    | -    | -    | -    | 1532 | 1512 | 1524 | $\nu(\text{CH})$ (chain) + $\delta_{\text{IN}}(\text{NH})$ (chain and side chain)                                                                                                                                                |
| -          | -    | -    | 1556 (vw)   | 1588 | 1553 | -    | -    | -    | -    | -    | -    | -    | -    | -    | $\nu(\text{C=C}) + \delta(\text{CH})$ in plane + $\delta(\text{NH}) + \omega(\text{CH}_3)$ (isoxazole ring and benzene)                                                                                                          |

# Supplementary Data

|            |      |      |             |      |      |          |      |      |          |      |      |      |      |      |                                                                                                                           |
|------------|------|------|-------------|------|------|----------|------|------|----------|------|------|------|------|------|---------------------------------------------------------------------------------------------------------------------------|
|            |      |      |             |      |      |          |      |      |          |      |      |      |      |      | ring)                                                                                                                     |
| 1582 (m)   | 1600 | 1568 | 1578 (w)    | 1605 | 1569 | 1585     | 1570 | 1605 | 1582     | 1571 | 1606 | 1585 | 1571 | 1606 | $\nu(\text{CC}) + \delta_{\text{IN}}(\text{CH})$ (benzene ring)                                                           |
| 1600 (m)   | 1620 | 1588 | 1606 (vs)   | 1621 | 1588 | 1602     | 1588 | 1623 | 1600     | 1584 | 1619 | 1602 | 1591 | 1626 | $\nu(\text{CC}) + \delta_{\text{IN}}(\text{CH})$ (benzene ring)                                                           |
| -          | -    | -    | -           | -    | -    | 1638     | 1613 | 1628 | -        | -    | -    | -    | -    | -    | $\beta(\text{NH}_2)$                                                                                                      |
| 1638 (vw)  | 1752 | 1679 | 1649 (w)    | 1735 | 1652 | -        | -    | -    | 1666     | 1681 | 1743 | 1660 | 1631 | 1687 | $\nu(\text{C=O}) + \delta_{\text{IN}}(\text{NH})$ (chain and benzene ring)                                                |
| -          | -    | -    | -           | -    | -    | -        | -    | -    | -        | -    | -    | 1683 | 1695 | 1769 | $\nu(\text{C=O}) + \delta_{\text{IN}}(\text{NH}) + \delta_{\text{IN}}(\text{CH})$ (side chain)                            |
| -          | -    | -    | -           | -    | -    | 1693     | 1680 | 1756 | -        | -    | -    | -    | -    | -    | $\nu(\text{C=O})$ (side chain)                                                                                            |
| 1700 (w)   | 1784 | 1722 | -           | -    | -    | -        | -    | -    | -        | -    | -    | -    | -    | -    | $\nu(\text{C=O}) + \delta(\text{OH})$                                                                                     |
| 1775 (w)   | 1808 | 1745 | 1755 (vw)   | 1786 | 1720 | 1764     | -    | -    | 1766     | 1717 | 1778 | -    | 1742 | 1814 | $\nu(\text{C=O})$ (on penam core) + $\delta_{\text{IN}}(\text{OH})$ + $\delta_{\text{IN}}(\text{CH})$ (thiazolidine ring) |
|            |      |      | -           | -    | -    | -        | 1723 | 1797 |          | 1721 | 1781 |      |      |      | $\nu(\text{C=O}) + \delta_{\text{IN}}(\text{OH})$ (penam core)                                                            |
|            |      |      | 1772sh(vw)  | 1801 | 1744 | -        | 1745 | 1822 |          | 1744 | 1812 |      |      |      | $\nu(\text{C=O}) + \delta_{\text{IN}}(\text{OH})$ (penam core)                                                            |
| -          | -    | -    | -           | -    | -    | 2714     | -    | -    | -        | -    | -    | -    | -    | -    | -                                                                                                                         |
| 2727(vw)   | -    | -    | 2729(vw)    | -    | -    | 2729     | -    | -    | 2731     | -    | -    | 2726 | -    | -    | -                                                                                                                         |
| 2738sh(vw) | -    | -    | 2749sh(vw)  | -    | -    | 2757     | -    | -    | -        | -    | -    | -    | -    | -    | -                                                                                                                         |
| 2769(vw)   | -    | -    | 2771 (vw)   | -    | -    | -        | -    | -    | 2771     | -    | -    | 2770 | -    | -    | -                                                                                                                         |
| 2785sh(vw) | -    | -    | -           | -    | -    | -        | -    | -    | -        | -    | -    | -    | -    | -    | -                                                                                                                         |
| 2823(vw)   | -    | -    | -           | -    | -    | -        | -    | -    | -        | -    | -    | -    | -    | -    | -                                                                                                                         |
| 2859(vw)   | -    | -    | 2862sh (vw) | -    | -    | -        | -    | -    | 2861     | -    | -    | 2861 | -    | -    | -                                                                                                                         |
| -          | -    | -    | -           | -    | -    | 2872     | -    | -    | 2873     | -    | -    | -    | -    | -    | -                                                                                                                         |
| 2883sh(vw) | -    | -    | 2883sh (vw) | -    | -    | -        | -    | -    | 2883     | -    | -    | -    | -    | -    | -                                                                                                                         |
| 2896sh(w)  | -    | -    | -           | -    | -    | -        | -    | -    | -        | -    | -    | -    | -    | -    | -                                                                                                                         |
| -          | -    | -    | 2906sh (vw) | -    | -    | 2902     | 2899 | 2884 | 2904     | -    | -    | -    | 2916 | 2885 | $\nu_{\text{sym}}(\text{CH}_2)$ in phase                                                                                  |
| 2918(s)    | 2905 | 2932 | -           | -    | -    | -        | -    | -    | -        | -    | -    | 2914 | 2931 | 2916 | $\nu_{\text{sym}}(\text{CH}_3)$ out of phase                                                                              |
| -          | -    | -    | 2930 (m)    | 2936 | 2932 | 2931     | -    | -    | 2932     | 2938 | 2953 | 2933 | 2937 | 2949 | $\nu_{\text{sym}}(\text{CH}_3)$ in phase                                                                                  |
| 2936(m)    | 2919 | 2938 | 2937sh      | 2923 | 2938 | 2940     | 2932 | 2922 | -        | -    | -    | -    | -    | -    | $\nu_{\text{sym}}(\text{CH}_3)$ out of phase                                                                              |
| -          | -    | -    |             | 2963 | 2939 | -        | -    | -    | -        | -    | -    | -    | -    | -    | $\nu_{\text{sym}}(\text{CH}_3)$ (isoxazole ring)                                                                          |
| 2957(s)    | 2958 | 2951 | 2952 (w)    | 2962 | 2976 | 2954     | -    | -    | -        | -    | -    | -    | -    | -    | $\nu(\text{CH})$ (thiazolidine ring)                                                                                      |
| -          | -    | -    | 2971 (w)    | 2964 | 2993 | -        | -    | -    | 2970     | 2998 | 2989 | -    | -    | -    | $\nu_{\text{as}}(\text{CH}_3)$ (side chain)                                                                               |
| -          | -    | -    | -           | 2976 | 2994 | 2975     | 2977 | 2962 | -        | -    | -    | 2975 | 2994 | 2987 | $\nu_{\text{as}}(\text{CH}_3)$ out of phase                                                                               |
| 2979(s)    | 2980 | 2977 | -           | 2990 | 2995 | -        | -    | -    | 2980 sh  | -    | -    | -    | -    | -    | $\nu_{\text{as}}(\text{CH}_3)$ (penam core) + $\nu_{\text{OUT}}(\text{CH})$ (2-azetidinone ring)                          |
| -          | -    | 2984 | -           | 2983 | 2999 | 2985     | 2993 | 2972 | -        | -    | -    | -    | -    | -    | $\nu(\text{CH})$ out of phase (2-azetidinone ring)                                                                        |
| -          | -    | 2989 | 2986 (w)    | 2995 | 3001 | -        | -    | -    | -        | -    | -    | -    | -    | -    | $\nu_{\text{as}}(\text{CH}_3)$ (penam core)                                                                               |
| 3002(vw)   | 3017 | 2994 | 3010 (w)    | 3004 | 3009 | 3009     | 3009 | 3004 | -        | -    | -    | -    | -    | -    | $\nu_{\text{as}}(\text{CH}_3)$ out phase                                                                                  |
| 3031 sh    | -    | 3009 | 3029sh (vw) | -    | -    | 3031     | -    | -    | 3029     | 3060 | 3024 | -    | -    | -    | $\nu_{\text{as}}(\text{CH})$ out of phase (benzene ring)                                                                  |
| 3041sh (m) | 3048 | 3052 | -           | -    | -    | 3048     | 3047 | 3037 | -        | -    | -    | -    | -    | -    | $\nu_{\text{as}}(\text{CH})$ in phase (benzene ring)                                                                      |
| -          | -    | 3054 | 3055sh (w)  | 3048 | 3049 | -        | -    | -    | -        | -    | -    | -    | -    | -    | $\nu_{\text{as}}(\text{CH}_3)$ (side chain)                                                                               |
| 3060(m)    | 3074 | 3073 | 3066 (m)    | 3064 | 3062 | 3061 (m) | 3084 | 3076 | 3061 (m) | 3087 | 3082 | 3061 | 3087 | 3087 | $\nu(\text{CH})$ (benzene ring) in phase                                                                                  |
| 3163 (vw)  | 3090 | 3186 | 3211 (vw)   | 3118 | 3192 | 3169     | 3189 | 3108 | -        | -    | -    | -    | -    | -    | $\nu(\text{OH})$                                                                                                          |
| -          | -    | -    | -           | -    | -    | 3333     | 3369 | 3318 | -        | -    | -    | -    | -    | -    | $\nu_{\text{sym}}(\text{NH}_2)$                                                                                           |
| 3355(w)    | 3417 | 3477 | -           | -    | -    | -        | 3441 | 3351 | -        | -    | -    | -    | -    | -    | $\nu_{\text{as}}(\text{NH}_2)$                                                                                            |
| -          | -    | -    | -           | 3419 | 3482 | -        | 3468 | 3399 | -        | -    | -    | -    | -    | -    | $\nu(\text{NH})$                                                                                                          |

$\nu$  – stretching;  $\beta$  – bending;  $\delta$  – out of plane bending;  $\rho$  – rocking;  $\omega$  – asymmetric stretching;  $\tau$  – twisting; HB – hydrogen bonding

## Supplementary Data

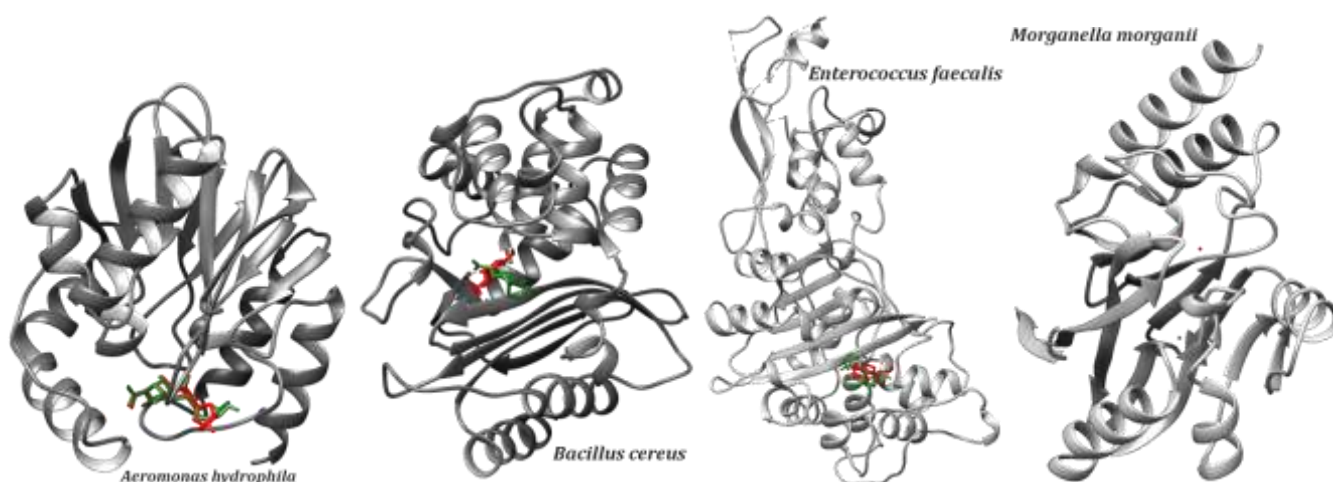

**Figure S1** - Docking position (green) of the original ligands overlapped to their initial position (red) as found in the complex with the selected receptors in crystal structure form – *A. hydrophila* – chain A of the zinc carbapenemase CphA (PDB id: 1x8i) in complex with biapenem, *M. morganii* – chain A from metallo-beta-lactamase IMP-27 (PDB id: 6l3s) in complex with  $Zn^{2+}$ , *B. cereus* – chain A from class A beta-lactamase (PDB id: 6w33) in complex with clavulanate, and *E. faecalis* – chain A of penicillin-binding protein 4 PDB4 (PDB id: 6mkh) in complex with imipenem.

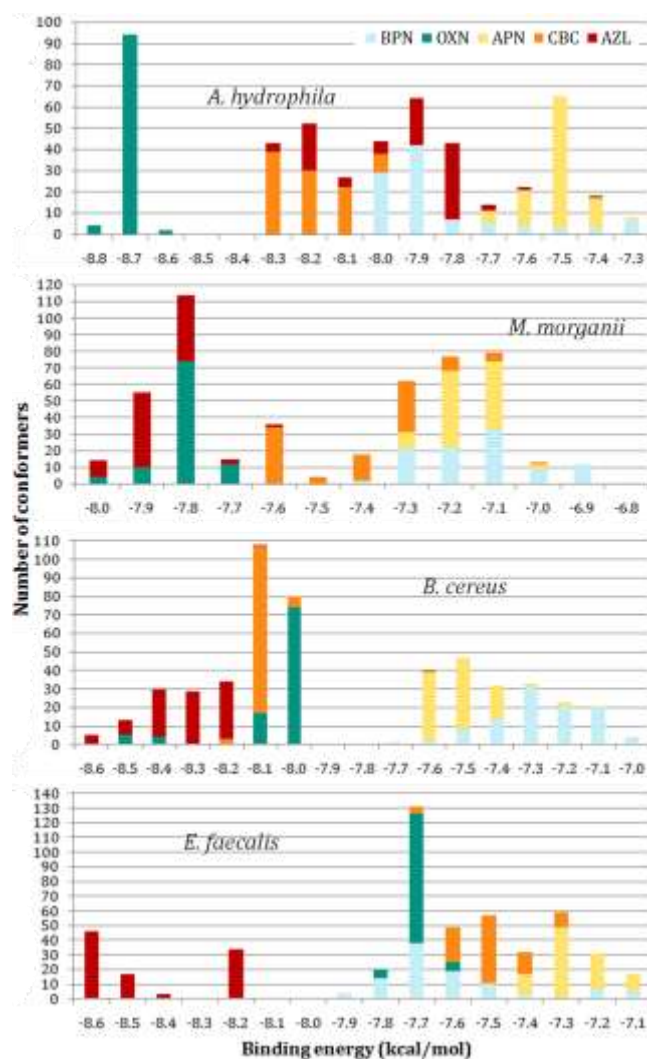

**Figure S2** – Number of conformers scoring the lowest values of the binding energy (kcal/mol) for each of the hundred runs of the molecular docking for all twenty ligand-receptor systems considered, with *A. hydrophila*, *M. morganii*, *B. cereus*, and *E. faecalis* as receptors and benzylpenicillin (BPN – light blue), oxacillin (OXN – petrol), ampicillin (APN – yellow), carbenicillin (CBC – orange), and azlocillin (AZL – red), as ligands.

## Supplementary Data

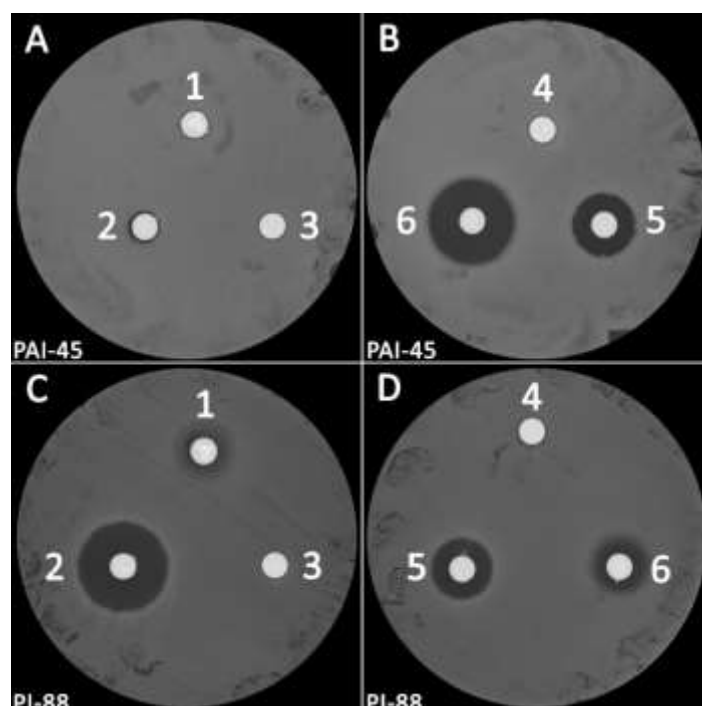

**Figure S3** – Optical images representing sensitivity tests to six selected antibiotics of the Gram-negative *A. hydrophila* specie PAI-45 (A and B) and PI-88 (C and D). Both resistance and sensitivity to the antibiotics (1 – ampicillin, 2 – carbenicillin, 3 – oxacillin, 4 – penicillin G, 5 – azlocillin, and 6 – tetracyclin) can be observed.

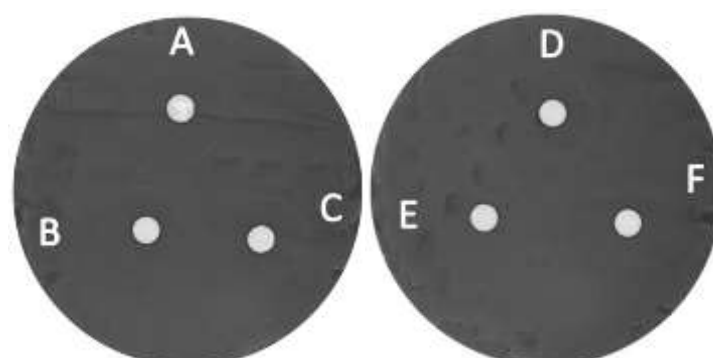

**Figure S4** – Optical images representing sensitivity tests to six selected antibiotics of the Gram-negative *M. morganii* PI-81. The pathogen presented resistivity to all six antibiotics (A – ampicillin, B – carbenicillin, C – oxacillin, D – penicillin G, E – azlocillin, and F – tetracycline).

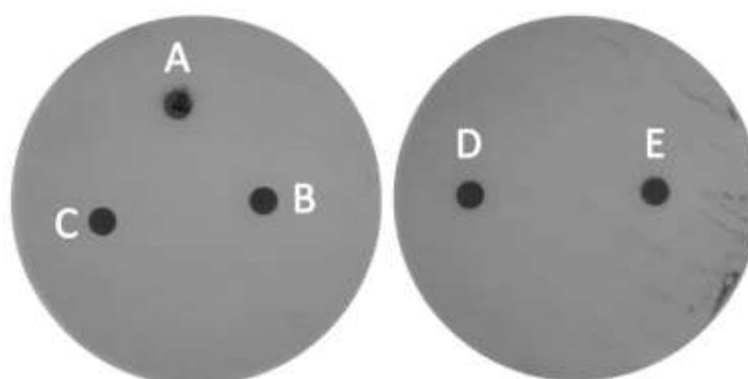

**Figure S5** – Optical images representing the sensitivity tests to five antibiotics of Gram-positive pathogen *B. cereus* ESN-09, which presented resistance to all five antibiotics (A – ampicillin, B – carbenicillin, C- oxacillin, D – azlocillin, and E – penicillin G).

## Supplementary Data

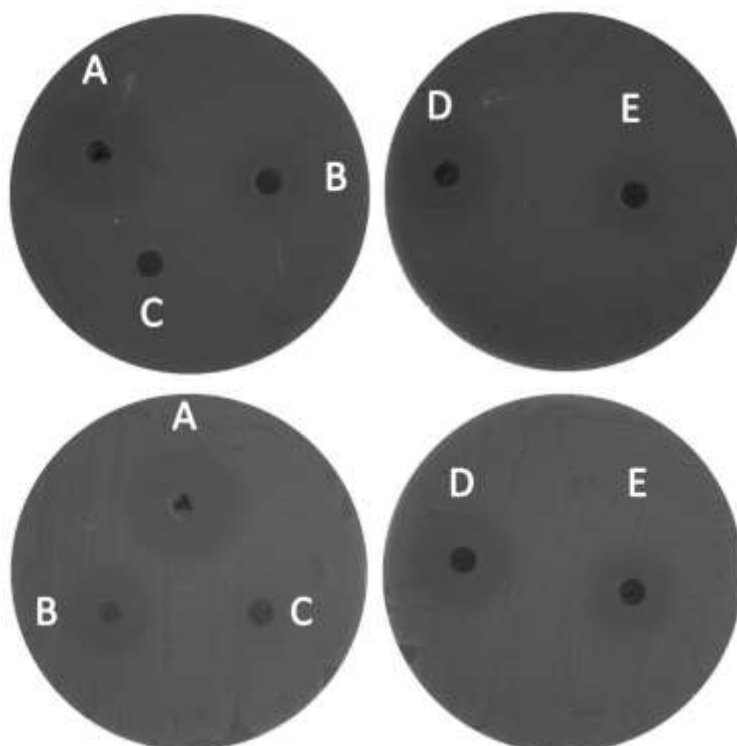

**Figure S6** – Optical images picturing sensitivity tests to five antibiotics (A – ampicillin, B – carbenicillin, C- oxacillin, D – azlocillin, and E – penicillin G) of Gram-positive *E. lactis* CE-13 (top) and *E. durans* CI-28 (bottom) which show resistance to oxacillin, while being sensitive to the other four considered antibiotics.

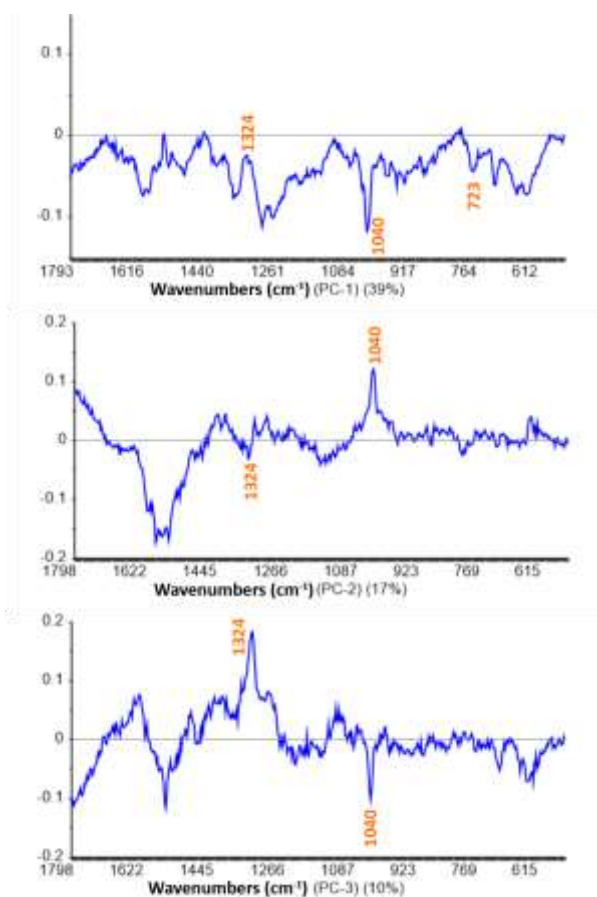

**Figure S7** – Loadings plots for PC-1, PC-2, and PC-3 in the PCA performed on the full spectral range of the database containing same day samples. SERS marker bands with the greatest scores on the loadings plots are marked in orange for each PC.
